# Supplementary material
Source: ML conference proceedings conference paper supplement (https://openreview.net/forum?id=wYYCBNLEmBv)
Supplement: supplementary_material [file attachment]

## Running the code

```
$ python main.py --dataset [dataset]
```

## Required packages

Following packages are required (along with their dependencies):

- torch == 1.9
- numpy == 1.18
- scipy == 1.8
- sklearn == 0.21.3
